# Supplementary material for: Giant mid-Holocene landslide-generated tsunamis recorded in lake sediments from Saqqaq, West Greenland
Source: Copernicus journal article supplement (doi:10.5194/nhess-2023-32), 2023-03-13
Supplement: Supplementary file [file nhess-2023-32-RC3-supplement.pdf]

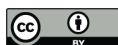

# Giant mid-Holocene landslide-generated tsunamis recorded in lake sediments from Saqqaq, West Greenland

Niels J. Korsgaard<sup>1</sup>, Kristian Svennevig<sup>1</sup>, Anne S. Søndergaard<sup>2</sup>, Gregor Luetzenburg<sup>1,3</sup>, Mimmi Oksman<sup>1</sup>, and Nicolaj K. Larsen<sup>4</sup>

5 <sup>1</sup> Department of Glaciology and Climate, Geological Survey of Denmark and Greenland, Copenhagen, Denmark

<sup>2</sup> Laboratory of Ion Beam Physics, ETH Zürich, Switzerland

<sup>3</sup> Department of Geosciences and Natural Resource Management, University of Copenhagen, Copenhagen, Denmark

<sup>4</sup> Globe Institute, University of Copenhagen, Copenhagen, Denmark

10

Correspondence to: Niels J. Korsgaard (njk@geus.dk)

## Abstract.

The Vaigat strait (*Sullorsuaq*) in central West Greenland is well known for its susceptibility to landslides and historical landslide-generated tsunamis. Recent mapping of the seabed in the Vaigat Strait has revealed several prehistoric **giga-scale** **tsunamiogenic** landslides; however, their ages are unknown. Here, we report sedimentological **evidence from six coastal** lakes at 19 to 134 m above sea level (a.s.l.) on the Saqqaq foreland located at the eastern end of Vaigat. Using optical, X-ray fluorescence (XRF), and magnetic susceptibility core scanning in our sedimentological analysis along with a screening for marine diatoms and radiocarbon dating, we find evidence of at least two tsunami events occurring at 7.6 and 7.3 cal. ka BP. Using a previously published, recalibrated relative sea level curve from Arveprinsen Ejland (*Alluttoq*), located 40 km southeast of Saqqaq, we infer wave run-up heights of 41-66 and 45-70 m respectively for the two tsunamis. These run-up heights from prehistoric tsunamis are several orders of magnitude larger than the historic landslide-tsunami run-up heights at Saqqaq which only reached an elevation of c. 3 m in November 2000. While two giant tsunamis can be found in the lake sediment records, landforms from at least nine giga-scale landslides are present on the seafloor of Vaigat, we infer that the older giant tsunamis must have happened between the last deglaciation and the oldest sediment in the lakes (c. 10 to 8.5 cal. ka BP).

25

## 1 Introduction

Landslide-tsunamis are among the most devastating natural disasters in fjord settings with several recent examples from Norway and Alaska (e.g., Blikra et al., 2006; Higman et al., 2018; Svennevig et al., 2020, 2023a). A landslide-tsunami occurs when large rock masses suddenly fail and slide into a water body, usually in the form of a rock avalanche (*sensu* Hungr et al., 2014 and Hermanns et al., 2021), displacing large amounts of water that travel through the fjord rising to a tsunami wave that

30

can inundate nearby coastal areas (Hermanns et al, 2013). As such, landslides with tsunamigenic potential pose a direct threat to coastal communities, and under a warming climate they are expected to occur more frequently (Patton et al., 2019).

The Vaigat strait (*Sullorsuaq*; Fig. 1) in central West Greenland has experienced two landslide-triggered tsunamis in 1952 and 35 2000 (Pedersen et al., 2002; Dahl-Jensen et al., 2004; Svennevig et al., 2023a). In 1952, the tsunami caused damage to infrastructure in the settlement of Qullissat and a loss of one human life (Svennevig et al., 2023a). In 2000, the landslide at Paatuut generated large waves which hit the settlement of Saqqaq, while the now abandoned settlement of Qullissat, experienced severe damage to buildings at lower elevations (Pedersen et al., 2002). In 2021, a third landslide occurred at 40 Assapaat in between the Niortuut and the Paatuut landslide (Fig. 1). Although  $c. 4 \times 10^6 \text{ m}^3$  ( $0.004 \text{ km}^3$ ) of material entered the Vaigat strait, no tsunami was observed, which is probably due to local topographical control and the specific dynamics of this landslide (Svennevig et al., 2022). It has recently been showed that the historical landslides in Vaigat were preconditioned by permafrost degradation (Svennevig et al., 2022, 2023a). Farther north at Karrat Isfjord, a large rock avalanche triggered a tsunami in June 2017 that inundated the nearby settlement of Nuugaatsiaq and cost four human lives (Paris et al., 2019; Svennevig et al., 2020) demonstrating the activities of such processes also outside the Vaigat Strait. Svennevig et al. (2020) 45 mapped three areas of continued slope deformation near the 2017 landslide and today the two settlements of Illorsuit and Nuugaatsiaq with a combined 170 inhabitants are closed due to continued risk of landslide induced tsunamis in the area.

  Svennevig (2019) compiled a preliminary inventory of landslides in Greenland based on available Digital Elevation Models (DEMs) and bathymetric data. In the Vaigat strait, nine large landslides were mapped. They consist of large lobes of submarine 50 landslide deposits and are recognizable by their hummocky and blocky topography in the otherwise smooth glacially carved, U-shaped fjord comprising the Vaigat strait (Fig. 1.) (Svennevig et al., 2023b). Based on long runout, large volume, and giant displaced blocks Svennevig et al. (2023b) suggested that these rock avalanches had a significant tsunamigenic potential. Seismic profiles from Vaigat show the presence of localized chaotic accumulations of sediment interpreted as either old submarine slides or submarine aggradations from subaerial landslides, with a general thickness of 50-100 m that can locally 55 exceed 200 m (Marcussen et al., 2001; Pedersen et al., 2002). However, little is known of the timing and tsunamigenic potential of these giant events.

Coastal lake sediments are excellent archives for capturing and preserving evidence of past tsunami events as these events have a distinct lithological signature that is different than the normal lacustrine sedimentation (e.g., Bondevik et al., 1997; 60 Long et al., 2015). If several lakes are cored in the same area at different elevation the sedimentological records can furthermore be used to estimate the run-up height of a tsunami and thus its magnitude (e.g., Bondevik et al., 1997). Evidence of tsunami deposits in Greenland is rare and have only been encountered by coincidence three times in relation to paleoclimatic studies or relative sea level reconstructions using lake sediment records. In Lake Loon in East Greenland and in the Ammassalik area in Southeast Greenland deposits attributed to the Storegga submarine slide have been described (Wagner et al. 2006; Long et

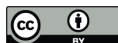

65 al., 2008). In Disko Bugt (*Qeqertarsuup Tunua*) in West Greenland, tsunami deposits attributed to rolling icebergs were found  
(Long et al., 2015).

Until now no systematic study of lake sediment cores has been undertaken to reconstruct the Holocene tsunami history in  
Vaigat. In this study we use six lake sediment cores from the coastal foreland at Saqqaq in the Vaigat Strait to constrain the  
70 timing and magnitude of prehistoric tsunamis.

## 2 Study site: Saqqaq foreland and surroundings

The settlement of Saqqaq (population 132 in 2020) in central West Greenland is situated on the southern coast of the Saqqaq  
foreland protruding into Vaigat (Fig. 1). The elevation of the foreland gradually increases from sea level up to c. 200 m about  
5 km from the coast at the foot of the c. 900 m high mountains (Fig. 2). West of the foreland lies Saqqaqdalen which is a valley  
75 with a flat floor consisting of a fluvial plain that continues into the Umîvik delta.

This exposed coastal configuration and the multiple lakes situated at different elevations, also known as a staircase, makes the  
Saqqaq foreland ideal for retaining evidence of past tsunamis to determine the timing and elevation of tsunami run-up. The  
exposure to tsunami waves would have been more pronounced in the Early Holocene time considering Saqqaqdalen would  
80 have been submerged more than 70 m due to glacial isostatic uplift after deglaciation of the area at 9.5 cal. ka BP (Weidick  
and Bennike; Table 2; Fig. 2).

The landscape surrounding the lakes consists of undulating bedrock surfaces with a thin and discontinuous sediment. The  
bedrock of the Saqqaq foreland generally consists of Precambrian granodiorite augen gneiss (Garde, 1994). An outcrop of the  
85 Kingittoq Member (Mb), a Late Cretaceous (Cenomanian) fluvial and deltaic deposit is located on the mountain slopes (Fig.  
2), and consists of successions of mudstones, heteroliths and well-sorted sandstones (Pulvertaft, 1989). At the type section of  
this member 25 km northwest of Saqqaq, sandstone sheets are often overlain by carbonaceous heterolithic mudstones with thin  
coal beds (Dam et al., 2009). At Saqqaq, the Kingittoq Member is more coarse-grained and consists of cross-bedded pebble  
conglomerates, with no coal beds reported (Pulvertaft, 1989).

90

### 2.1 The November 2000 tsunami in Saqqaq

Detailed observations of run-up heights for the tsunami in Saqqaq in November 2000 have previously not been published. To  
compare these to the paleotsunamis reported below we have mapped the run-up height of this event using recognizable  
buildings in photographs taken after the event (Fig. 3A). As the land was snow covered at the time of the event and the tsunami  
95 occurred at mean sea level, the maximum runup is readily recognizable. West of the peninsula, the maximum run-up height



was c. 3 m whereas east of the peninsula, no visible tsunami run-up was observed (Fig. 3A). Saqqaq is not in direct line of sight to the Paatuut landslide 55 km away (Fig. 1) thus the waves that were observed have been reflected and refracted.

### 3 Methods

100 Six lakes were selected using high-resolution satellite images and a 2 m resolution digital elevation model (DEM) (SDFI, 2018). Lakes with small, local catchments were chosen and lakes with large tributaries or visible influx of sediment were avoided. Their sill elevations ranges from 19 m to 134 m a.s.l. (Fig. 2). The lake depth was measured using a GARMIN echo sounder and the sediment cores were obtained at the deepest part of the lake g a 60 mm piston corer from a Zodiac inflatable boat.

105 After recovering the sediment cores, they were kept upright and drained before shipped to Denmark where they were stored under refrigerated conditions at 2-4 °C. In the laboratory, the cores were split, and the stratigraphy described. The cores were scanned using an ITRAX core scanner to obtain X-ray fluorescence (XRF), X-ray imagery, magnetic susceptibility (MS) and an optical line scan image. The cores were scanned with a 1 mm resolution using a standard setting of 30 kV and 50 mA for the X-ray fluorescence scanning and a dwell time of 30 seconds. The X-ray settings were 3 kV and 50 mA with a dwell  
110 time of 1 second and a step size of 0.2 mm. Both XRF and X-ray used a Rh tube. The MS has a step size of 4 mm, and the optical scan has a resolution of 0.047 mm. The ITRAX core scanner provides counts of c. 40 elements, and it has been used to identify tsunami deposits onshore and in lake cores (e.g., Chagué-Goff et al., 2017; Shinozaki, 2021). In this study, we use the element Titanium (Ti) as a proxy for minerogenic input to the lake (e.g., tsunami and glaciofluvial deposits) and the element ratio Ca/Fe as a proxy for marine influence in the sediment i.e., in tsunami deposits.

115 We identify the tsunami deposits in the cores using typical stratigraphic signatures identified by Bondevik et al. (1997) and summarized by Long et al. (2018). These are stratigraphical signatures in lake sediments that have been found in lakes inundated with the tsunami waves from the Storegga submarine landslide off the coast of Norway. Here, the base of the tsunami deposit consists of massive or graded sand suggesting a rapid deposition from suspension. Below the base of the tsunami  
120 deposit is typically an erosional unconformity eroded into existing sediments by the turbulence from the tsunami as it crossed the lake threshold. Above the sand, a facies termed “organic conglomerate” may be present. This facies consists of coarse organic detritus with large rip-up clasts of gyttja, peat, and silt. The large rip-up clasts are of irregular form and sizes and occur with twigs and plant fragments in a matrix of gyttja and silt. Lenses of sand may also be present (Bondevik et al., 1997).

125 The chronology is based on AMS radiocarbon ( $^{14}\text{C}$ ) dating of aquatic plant macrofossils or bulk sediment samples **if we were unable to identify enough macrofossils**. Unfortunately, it was not possible to find sufficient amounts of terrestrial macrofossils although they are ideal for  $^{14}\text{C}$  dating (Strunk et al., 2020). The local bedrock consists of non-calcareous rocks, hence no

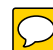

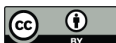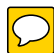

130 problems using aquatic macrofossils or bulk sediment samples for dating the cores are expected. Samples for radiocarbon dating were collected from five of the six cores (Table 1). In total, thirteen samples were dated to constrain the age of the cores and provide age control of tsunami events. We used three sampling strategies to determine the age of a tsunami deposit. To provide a maximum age of the events samples were dated below the tsunami deposit under an erosional unconformity. Bulk sampling of rip-up clasts or macrofossils embedded in the tsunami deposit were also dated to provide a maximum age, while a minimum age is obtained by dating lacustrine samples above the tsunami deposit where lacustrine sediments re-occurred. The  $^{14}\text{C}$  ages were calibrated into calendar years using the OxCal v4.4 (Ramsey, 2009) and the IntCal20 calibration curve  
135 (Reimer et al., 2020).

We also use radiocarbon ages from Weidick (1968) and Long et al. (1999), which we have recalibrated for standardization with the radiocarbon ages used in this study (Table 1). One or more shells from Saqqaq were dated by Weidick (1968) providing the minimum age of deglaciation (Weidick, 1968) and a minimum height of the relative sea level (Weidick,  
140 1972) at that time. There is no local relative sea level curve for Saqqaq, so we recalibrate existing isolation basin radiocarbon dates from Long et al. (1999) from Vaskebugt (*Kangerluarsuk*), Arveprinsen Ejland (*Alluttoq*) (See Fig. 6 for RSL curve) This location is situated 40 km to the southeast of Saqqaq (Fig. 8) and would have deglaciated a few hundred years later than Saqqaq.

145 We screened sediment core SAQ21-06 from relevant depths for diatom assemblages in order to find marine species that could be used as indicator of marine water intrusion to lakes. In total five diatom microscopy slides were prepared according to Battarbee et al. (2001). We treated c. 0.2-0.5 grams of fresh sediment with 10 % hydrochloric acid (HCl) and 30 % hydrogen peroxide (H<sub>2</sub>O<sub>2</sub>) in a water bath for 4 hours to remove carbonates and organic material from the sediment. Samples were rinsed with distilled water and slides were mounted using Naphrax® with a refractive index of 1.73. Diatoms were identified  
150 with an Olympus BX51 light microscope using phase contrast optics at 1000x magnification.

#### 4 Results

Of the six lake cores retrieved, four can be used to identify or constrain the age of tsunami deposits. The other two - SAQ21-05 and SAQ21-08 - contain little information of relevance to our analysis but are included for completeness of reporting the  
155 field data. Lake coring site characteristics are summarized in Table 2 and cores are plotted with sediment proxies in Fig. 4. Except for core SAQ21-05, all core lengths reflect the thickness of the sediment package until the corer encountered bedrock or an impenetrable substrate. Multiple coring attempts were conducted to extract a longer core from SAQ21-05. These suggested the presence of a sediment package with a thickness of c. 30 cm, however, we only successfully managed to extract



9 cm. The sediments flushing out of the cracked coring tubes were judged in the field to be similar to the sediments captured  
160 in the corer.

## 4.1 Lacustrine and glaciolacustrine deposits

### 4.1.1. Gyttja facies

The organic-rich gyttja is the main lithology in all cores. It is brown to brownish-grey and vary from being finely laminated to  
165 massive in composition (Fig. 4, Fig. 5). Both the laminated and massive gyttja have very low minerogenic content characterized  
by low Ti and MS.

### 4.1.2 Silty-sand facies

The silty-sand facies is found only in lake SAQ21-08, where it constitutes the lower 43 cm of the 51 cm long core (Fig. 4).  
170 The facies is highly minerogenic consisting of massive silt and fine sand with grains of coarse to very coarse sand embedded  
in the silty sand. It is characterized by a high Ti and MS.

### 4.1.3 Interpretation of gyttja and silty-sand facies

The gyttja facies is interpreted to as lacustrine sediments deposited under normal conditions in the lakes without input from  
175 glaciers. The variations in gyttja composition between the lake records probably reflect different lake sizes, and depths as well  
as catchment properties. The silty-sand facies is interpreted as glaciolacustrine sediments that were deposited during the  
deglaciation of the Saqqaq foreland c. 9.5 cal. ka BP (Weidick, 1968).

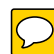

## 4.3 Tsunami deposits

180 We have identified deposits from two tsunami events, T1 and T2, which are both present in cores SAQ21-06 and SAQ21-09  
(Fig. 4 and Fig. 5).

### 4.2.1 Tsunami unit 1 (T1)

The younger (T1) tsunami deposit is 41-48 cm thick in SAQ21-06 and SAQ21-09, respectively. In both cores, it has a distinct  
185 erosional base followed by a layer of massive coarse to very coarse sand (grain size 1-2 mm). In SAQ21-09, T1 has eroded  
into the sediments of T2, while in SAQ21-06 there is a laminated gyttja facies in between the two tsunami deposits, making it



possible to separate the T1 from T2. In SAQ21-09 there is a 3.5 cm massive sand layer above the erosional unconformity. The massive sand is followed by 38 cm of organic conglomerate consisting of irregular clasts composed of silt or sand and with plant fragments. Some of the rip-up clasts consist of laminated gyttja and the size of the clasts decreases upwards in T1 with several lenses of coarse sand visible within the organic conglomerate. The contact to the massive gyttja above is transitional for 1-2 cm .

In SAQ21-06 the corresponding massive sand layer is 0.5 cm thick with an erosional unconformity at the base. It is overlain by 27 cm of organic conglomerate consisting of large rip-up clasts of irregular form and size and with plant fragments, silts and sands. There are at least two erosional unconformities inside the organic conglomerate with layers of sand. A thin layer of sand constitutes the sharp contact between the organic conglomerate and 20 cm of organic detritus with some clasts gradually transitioning into the gyttja above.

Our sediment proxies (Fig. 4) MS, Ca/Fe, and Ti are all very high at the massive sand at the base of the tsunami sediments and where sand lenses are located in the organic conglomerates making the sediment proxies much more variable relative to the gyttja.

#### 4.3.1 Tsunami unit (T2)

In core SAQ21-09 the oldest tsunami unit (T2) makes up the bottom of the core. Here, the top of the 26 cm thick T2 sediments has been eroded by the overlying T1. In the other core, SAQ21-06, T2 is 7 cm thick and enclosed by laminated gyttja above and below.

At the base of the T2 in core SAQ21-09 is a 0.2 cm layer of massive coarse sand and very coarse sand. Most of the coarse sand flushed to the bottom of the tube when it was sealed and had to be cut off the main core. It is not shown here as primary sedimentary structures were not preserved. Above the massive sand is a 3 cm thick layer of organic detritus with sand grading upwards, which is followed by 6 cm of coarse organic detritus with small gyttja clasts and plant fragments in a matrix of fine-medium sand. Above is a 8 cm block of laminated gyttja, where the laminations of the gyttja are cross-cut by the unit below, indicating that the gyttja was deposited prior to the unit below and has been displaced subsequently. Then follows a 0.1 cm layer of coarse sand grading to medium-fine for 1 cm. The contact between the coarse sand and the laminated gyttja below is sharp. Overlying is 8 cm of coarse organic detritus with gyttja clasts and plant fragments and fine to medium sand.

The 7 cm thick T2 in SAQ21-06 consist of coarse organic detritus with clasts with a thin layer of sand at its base and a sharp contact without visible erosion of the laminated gyttja below. There are small clasts of gyttja and more plant fragments than in SAQ21-09. T2 has a sharp contact to the laminated gyttja above.





220

Our sediment proxies (Fig. 4) MS, Ca/Fe, and Ti are all very high in the organic detritus facies and low in the tilted block laminated gyttja in SAQ21-09. In the upper organic detritus facies in SAQ21-09 the variability is greater due to larger clasts.

#### 4.3.1 Interpretation of tsunami facies (T1 and T2)

225 We interpret T1 and T2 as tsunami deposits as it contains many of the diagnostic characteristics described by Bondevik et al. (1997). The lowest part of the T1 and T2 consists of coarse to very coarse sands with clear erosional unconformities at the base, the sand is angular and similar to the sand found in the terrain surrounding the lake. Thus, it is likely that the massive, coarse sand has been flushed into the lakes from the surroundings when the tsunami wave withdrew. In both deposits, this is followed by an organic conglomerate with rip-up clasts, sands, and plant fragments. The organic-rich conglomerates have erosional unconformities and lenses of sand which we interpret as caused by subsequent waves from the same landslide-tsunami wave train. SAQ21-06 has an additional tsunami facies of organic detritus above the organic conglomerate. We interpret the deposits in the two cores as tsunami deposits and based on visual appearance we assign the two deposits to the same tsunami event.

235 The T2 tsunami facies in the two lakes have the same signatures and we correlate them based on visual appearance. Although T2 has the same general appearance in the two, there are some notable differences reflecting that lake SAQ21-09 is much more exposed to tsunamis and experienced much more turbulence and erosion when inundated compared to SAQ21-06. In SAQ21-09, the coarser sand fraction at the base and the absence of gyttja below the base of the tsunami facies which is standing on an impenetrable substrate, as well as the presence of the signature of two distinct waves from the same landslide-tsunami, indicates that aspect to the strait and exposure to the incoming tsunamis is more important than lake height for capturing tsunamis in the lake sediments. This may also explain why there is no erosional unconformity in SAQ21-06.

#### 4.4 Diatoms

All prepared diatom microscope slides were screened to find marine diatom species that do not normally live in freshwater systems and thus could be used as an indicator for marine water invasion. Diatom assemblages in the samples included species that typically inhabit freshwater and weakly brackish systems. Most common species that were found in almost all the samples were *Navicula vulpina*, *Navicula similis*, *Neidium iridis*, *Stauroneis phoenicenteron*, and *Tabellaria flocculosa*. Only one sample from core SAQ21-06 from 61-62 cm depth (sampled from the massive sand in the base of the T1 deposit) included diatom species, *Cocconeis scutellum*, that is marine origin. *Cocconeis scutellum* is common for marine and brackish coastal waters (Cremer 1998; Witkowski et al., 2000; Pearce et al., 2014) and very common in fjords around Greenland (Oksman et al., 2022).





#### 4.5 Radiocarbon chronology

The age of the two tsunami units (T1 and T2) has been constrained in two cores SAQ21-06 and SAQ21-09. In addition  
255 information from the other cores can also help to determine the age of the tsunami deposits (Fig. 5).

Samples for radiocarbon dating of T2 were taken below and above the tsunami sediments in SAQ21-06. The bulk dates below  
are 8.1 and 7.9 cal. ka BP and the bulk date above 7.9 cal. ka BP suggesting an age of T2 of around 7.9 cal. ka BP. However,  
a macrofossil sampled at the top of T2 yields an age of 7.6 cal. ka BP indicating the T2 is younger than the 7.9 cal. ka BP that  
260 the bulk sediment samples bracketing T2 yield. We suggest that the small discrepancy between the macrofossil date at the top  
of T2 and the bulk date above T2 is related to the incorporation of older carbon in the bulk dates that makes them a few hundred  
years too old ages (Strunk et al., 2020). Accordingly, we conclude that T2 occurred around 7.6 cal. ka BP.

A bulk sediment sample below the erosional unconformity of T1 in SAQ21-06 yields a maximum age of 7.2 cal. ka BP. Above  
265 T1 are two dates yielding ages of 5.8 and 6.7 cal. ka BP i.e. T1 seems to have occurred between 7.2 and 6.7 cal. ka BP.  
However, in a nearby lake at lower elevation (SAQ21-07, 19 m a.s.l.) the sedimentary record shows continuous deposition of  
lacustrine sediments extending back to 7.3 cal. ka BP without any evidence of T1. To explain this discrepancy we see two  
possibilities. Either T1 is not a tsunami deposit but a local phenomenon or something is wrong with the dating of T1. As T1 is  
recorded in two lakes (SAQ21-09 and 06) i.e. is stratigraphically consistent it is not likely that it represents a slumping event  
270 or another local sedimentological phenomena and we interpret it as a tsunami deposit. Instead, we suggest that T1 must have  
occurred at c. 7.3 ca. ka BP (within the uncertainty of the  $^{14}\text{C}$  ages) to satisfy the chronology in both SAQ21-06 and 07.

#### 5 Discussion

We consider that the topographical setting, the relative sea level history, and the age of the events, in addition to the signatures  
for tsunami sediment facies in lakes used by Bondevik et al. (1997), to be helpful in evaluating possible depositional processes.  
275 For example, the topographical setting of the lake basins makes it impossible for flash flooding from rainstorms and glacial  
meltwater to reach the lakes (Fig. 2.), and these processes cannot explain the lake stratigraphy. Earthquakes can cause slumping  
in the lake sediments; however, West Greenland is considered tectonically stable with minimal active faulting (Voss et al.,  
2007) and the geometry and succession of the sediment facies do not suggest that slumping from the lake sides has occurred.  
In the following, we use the minimum run-up heights as a tool to assess the source and magnitude of the tsunami-triggering  
280 mechanism.



## 5.1 Tsunami run-up heights and magnitude

Our results show that at least two tsunamis T1 and T2 invaded the lakes at Saqqaq at c. 7.3 and 7.6 cal. ka BP, respectively (Fig. 5). We use the recalibrated RSL curve from Long et al. (1999) to plot the two events on curves showing the elevation of the lakes relative to the sea surface over time since deglaciation (Fig. 6). The older tsunami (T2) entered lake SAQ21-09 in 285 7.6 cal. ka BP when the lake had a minimum sill height of 41 m. Lake SAQ21-11, which is located 700 m further inland, has no evidence of tsunami deposits since 8.5 cal. ka BP. It had then a minimum sill height of 66 m. The bracket of minimum and maximum run-up height of tsunami T2 is thus 41-66 m (Fig 7). T2 is also recorded in lake SAQ21-06 which at the time had a minimum sill height of 21 m.

290

When the younger tsunami (T1) entered lake SAQ21-09 at 7.3 ka BP, the lake had a minimum sill height of 45 m marking the minimum run-up height. Like for T2, the maximum run-up height for T1 is also constrained by lake SAQ21-11 which at the time had a minimum sill height of 70 m. This brackets the run-up height of T1 to 45-70 m. T1 is also recorded in lake SAQ21-06 which had at the time had a minimum sill height of 25 m.

295

The absence of traces of tsunamis in the recorded lake stratigraphy in lake SAQ21-11 does not preclude that the lake was invaded by T1 and T2, as a tsunami wave loses energy as it moves inland and may leave no trace in the sedimentological record. It does, however, provide an upper bound on elevation where the tsunami was able to leave its signature in the stratigraphy.

300

## 5.2 Triggering mechanism of the tsunamis

Fig. 7 illustrates that 41 m is the minimum run-up height for any tsunami found in this study and we use this elevation to evaluate potential tsunami triggering mechanisms. Several mechanisms exist that can produce tsunamis in a setting such as Saqqaq, such as calving from glaciers, rolling icebergs, wave run-up during storms, earthquakes, and marine-terminating 305 landslides.

Calving from glacier fronts or capsizing icebergs can generate tsunamis. MacAyeal et al. (2011) suggested that as a rule, the open-water upper limit to tsunami wave height from such a calving or capsizing event is  $0.01H$ , where  $H$  is the initial vertical dimension of the iceberg. Between 7 and 8 ka ago the calving fronts of the marine terminating outlet glaciers draining the ice sheet into Disko Bugt (Qeqertarsuaq) would have been located roughly where they are today (Weidick and Bennicke, 2007), 310 and the icebergs would have had to travel 45 km through the fjords of Kangia (Jakobshavn Isfjord) or Torsukattak before entering Disko Bugt itself (Fig. 8). The water depth at the mouths of the two fjords restricts the vertical height of the icebergs to less than 250-350 m and thus the upper limit of the open-water tsunami wave height to c. 4 m. A typical depth at the bottom



of the Torsukattak fjord is 650 m, thus a tsunami initiated from calving would have an upper limit to wave height of c. 7 m, which would dissipate during the 65 km travel to Saqqaq (Fig. 8). Even though we do not consider the amplification of the wave heights as they near the shoreline, ice calving and capsizing icebergs do not have the ability to create waves with a run-up height of 41 m.

The wave climate in Disko Bugt is driven by a combination of locally generated wind waves and swells from the Davis Strait. The fetch for wave generation is limited, except towards the Davis Strait in south-westerly direction. Storms mostly occur during winter when sea ice at the coast limits almost all wave activity. During the sea ice free period, katabatic winds blow off the ice sheet from the east where fetch is limited. Consequently, wave run-up height is much less than the minimum found in any lake.

Earthquakes also has the potential to produce tsunamis. However West Greenland is situated on a tectonically passive continental margin and is considered tectonically stable (Voss et al., 2007).

Subaerial marine terminating landslides have the potential to produce very large run-up tsunamis in confined fjord settings (e.g., Dahl-Jensen et al., 2004; Sepulveda et al., 2010; Higman et al., 2018; Svennevig et al., 2020). The 1958 Lituya Bay landslide tsunami is the largest such tsunami recorded in historical times with a near field (c. 1.5 km from the source) maximum run-up height of 524 m (Franco et al., 2020) demonstrating the extreme tsunamigenic potential of landslides. Svennevig (2019) mapped several landslides in Vaigat strait and Pedersen et al. (2002) and Dahl-Jensen et al. (2004) marked Vaigat strait as an area where the bedrock configuration precondition landslides (Fig. 8). Svennevig et al. (2023b) found that at least nine giant post glacial rock avalanches deposits are present on the seafloor of Vaigat as little as 15 km from Saqqaq and argues, based on morphology along with the large volume and long runout, that these had a significant tsunamigenic potential.

Based on the high run-up heights and the presence of at least nine giant rock avalanches in Vaigat, we conclude that the tsunamis T1 and T2 recorded in our study were initiated by subaerial landslides entering the sea in the Vaigat strait.

### 5.3 Magnitude estimates of the tsunamigenic landslides

We cannot, based on the available data, pinpoint the specific landslides that triggered the tsunamis we have reconstructed from lake sediments. However, based on our estimated minimum and maximum run-up heights and the minimum and maximum distance to the largest landslides in the Vaigat strait (from Svennevig et al 2023b) we can assess the landslide volumes involved using the semi-empirical SPLASH equation (Oppikofer et al., 2018). The SPLASH equation is based on a limited number of



340 landslide tsunamis events, and none of them are of the magnitude we infer in the present work; however, it provides an estimate of the magnitude without using more advanced tsunami models which is beyond the scope of the present paper.

The distance to the giant landslides in the Vaigat strait (where they entered the sea) is 90 to 25 km (Fig. 8) and the run-ups for T1 is 45-70 m and T2 is 41-66 m as presented above (Fig. 7). Applying these numbers to the SPLASH equation we get that a landslide initiated 90 km away would have had a volume of 1.8 to 3.9 km<sup>3</sup> to produce the tsunami T1 and 1.5 to 3.3 km<sup>3</sup> to  
345 produce the tsunami T2. A landslide at the closest giant landslide deposit, just across Vaigat, 25 km to the southwest of Saqqaq (Fig. 8), would have had a volume of 0.34 to 0.74 km<sup>3</sup> to produce the tsunami T1 and 0.27 to 0.63 km<sup>3</sup> to produce the tsunami T2.

**Svennevig et al. (2023b)** calculates volumes of the three largest giant postglacial landslides in Vaigat (that may represent several events) to be c. 1.7 to 8.4 km<sup>3</sup>. The largest of these: the Ujarrassusuk rock avalanche complex is situated 25 km from  
350 Saqqaq just across the strait. Had this rock avalanche occurred in a single event, a run-up height of 280 m would be expected in Vaigat (also using SPLASH, Oppikofer et al., 2018).

This is significantly different from the up to 0.74 km<sup>3</sup> we infer above for the highest possible tsunami (T1). From the nine postglacial rock avalanche complexes described by **Svennevig et al. (2023b)**, we would expect more evidence of tsunami activity than the two events (T1 and T2) reported above and significantly higher waves. As our study does not cover the age  
355 interval from deglaciation at 10 cal. ka BP to 8.5 cal. ka BP, it is possible that deposits from the inferred multiple larger tsunamis are present in the tsunami probability field bracketed by these ages (Fig. 7).

Two recent landslide-triggered tsunamis have been observed in Vaigat, 1952 and in 2000. Both landslides originated from the slopes at the Nuussuaq Peninsula, the same coast Saqqaq is located. In 1952 after the Niiortuut landslide, a volume between 1.8 and 4.5 × 10<sup>6</sup> m<sup>3</sup> (0.0018-0.0045 km<sup>3</sup>) entered the sea and caused an estimated run-up in Saqqaq between 1 and 1.8 m  
360 (Svennevig et al., 2023a). During the 2000 Paatuut landslide 30 × 10<sup>6</sup> m<sup>3</sup> (0.03 km<sup>3</sup>) entered the sea (Dahl-Jensen et al., 2004) and triggered a tsunami that had a run-up of 3 m in Saqqaq (Fig. 3). Residents reported ‘strange waves’ for 2.5 hours. The location of the landslide and the duration of the wave run-up indicate multiple reflections off the steep slopes of the Vaigat strait. We conclude the T1 and T2 tsunamis also had an area of origin in the Vaigat strait. However, the historical landslides in Vaigat in 1952 and 2000 were at least an order of magnitude smaller than those who produced the T1 and T2 tsunamis we  
365 find in the lake sediment cores. We also note that there is a tsunami probability field of relatively large young tsunamis with a run-up of up to 19 m younger than 6 ka BP (Fig. 7). Constraining events in the two tsunami probability fields should be the priority of future studies.

With an increasing elevation and distance to the shore, landward lakes are expected to capture fewer and thinner sand beds,  
370 with a decreasing grain size (Bondevik et al., 1997). The sampled lakes are at different elevations with varying exposure to



reflected tsunami waves. Lakes SAQ21-09 and SAQ21-11 are far more exposed to direct waves coming from Vaigat strait than SAQ21-06 and SAQ21-07, and a landslide-tsunami reaching the latter two lakes would either have to wash over the Saqqaq foreland or reflect off the northern coast of Disko Island before reaching Saqqaq (Figs. 2 and 8). However, eyewitness accounts and videos from the 2017 Karrat fjord landslide tsunami show the complexity of waves reflected, refracted and diffracted in a fjord, especially when sea-ice is present (Paris et al., 2019). The first wave does not necessarily have the highest amplitude and waves can come from multiple directions. Therefore, at the Saqqaq foreland, the exposure of lakes to tsunami waves coming from Vaigat strait can be controlled either by the landward distance and elevation or by the exposure of lakes on the western side of the foreland. Potentially, several tsunami waves are captured by each lake at the Saqqaq foreland.

#### 380 **5.4 Implications for other records of tsunamigenic lake sediments in Disko Bugt**

Other tsunami deposits have been found in lakes surrounding Disko Bugt. At Vaskebugt, Arveprinsen Ejland (Fig. 8), Long et al. (2015) re-appraise two lake cores used for basin isolation dating in a previous study (Long et al., 1999) and propose that tsunamis generated by rolling icebergs could have deposited sediments in some of the lakes. The lakes have an ideal setting for capturing tsunamis, and cores V1 and V8 may contain tsunami deposits that previously have been interpreted as internal slumping in the lakes (Long et al., 2015). Of particular interest is the tsunami unit in core V1, which is a 0.5-2 cm thick unit of coarse sand and angular gravel with an erosive base. It is enclosed in freshwater gyttja, however in some instances it directly overlies the marine sediments, resembling the tsunami sediments described by Bondevik et al. (1997). Presently, the sill height of lake V1 is 61 m a.s.l. and would have been located at 0 m a.s.l. at 9.5 cal. ka BP (Fig. 6). The amount of erosion is unknown, but the tsunami must have occurred after 9.5 cal. ka BP. The lack of absolute age control on the tsunami facies limits the use of sill heights for discrimination between tsunamigenic mechanisms, but if for example, the tsunami had occurred 500 years after basin isolation – at 9 cal. ka BP - the lake would have risen to a sill height of 11 m a.s.l., which would exclude rolling icebergs as the tsunamigenic mechanism based on the arguments discussed above in section 5.2. Lake V8 is also located at Vaskebugt and presently has a sill height of c. 13 m and a modelled age of isolation of 6.7 cal. ka BP. It is suggested by Long et al. (2015) that the potential tsunami unit in this lake could represent a marine flooding of the lake basin and adjoining surfaces. The V8 radiocarbon sample (5.2 cal. ka BP) appears not to have been sampled at the marine contact, but above the tsunami facies and it is excluded from the RSL reconstruction in both Long et al. (1999) and the present study (Fig. 4). Thus, the tsunami responsible for the tsunami facies in lake V8 should have occurred between 6.7 and 5.2 cal. ka BP where the sill heights have been between 0 m and 12 m a.s.l. This is inside the younger tsunami possibility field (Fig. 7) and both landslides and rolling icebergs could have been the mechanism initiating the tsunami.

400

Long et al. (2015) also describe a likely tsunami deposit in lake IV4 at Tasiusarsuit in the southern part of Disko Bugt (Fig. 8) and attribute it to an iceberg generated tsunami occurring at 6.1 cal. ka BP (6242–5910 cal. ka BP). This single event is recorded in lake IV4 in the 200-year window where the estimated >3 m run-up height from an iceberg generated wave was able to reach



the lake. The interpretation that icebergs generated the waves that entered the lakes at Tasiusarsuit and Vaskebugt relies on a  
405 topographical analysis and the then current knowledge of landslide- and iceberg generated tsunamis in Disko Bugt (Long et  
al., 2015). An important assumption made by Long et al. (2015) is that the 2000 Paatuut landslide is the largest tsunamigenic  
landslide that is likely to occur in Vaigat, and due to large distances from areas with a high frequency of landslides in Vaigat  
and the south coast of Disko Island, the wave energy would have dissipated before reaching the lakes at Vaskebugt or  
Tasiusarsuit. Landslide tsunamis may also have reached lake IV at Tasiusarsuit from the south coast of Disko Island where  
410 Svennevig (2019) mapped giant landslides (Fig. 8). However, the seafloor off the south coast of Disko Island has only few  
depth soundings (Morlighem et al., 2021), and no presence of submarine landslide landforms has been reported.

The present study shows that there is onshore evidence of giant landslide-generated tsunamis in the Vaigat strait and these  
could have reached Vaskebugt and explain the presence of the tsunami units in lakes V1 and V8. The age control of these units  
415 is not of sufficient quality to unambiguously explain if these deposits were generated by waves from landslides or rolling  
icebergs.

Identifying additional tsunamis and constraining their timing are outstanding research questions, and the scientific literature  
on lake deposits (i.e., Long et al., 2015) and gaps in the bathymetric data indicates that this will be revealed by conducting  
420 additional offshore and onshore research in the Vaigat strait and Disko Bugt areas.

## 6 Conclusion

We analysed lake sediment cores from the Saqqaq foreland in central West Greenland and found sediments that we interpret  
to be deposited by tsunamis. We can distinguish between at least two tsunami events (T1: 7.3 and T2: 7.6 cal. ka BP), each  
with multiple waves, and determine minimum run-up heights of 45 and 41 m, respectively. We find no tsunami deposits in a  
425 higher elevation lake constraining the maximum possible run-up height to 70 and 66 m. Due to the large run-up heights, and  
the presence of deposits from giant rock avalanches in the Vaigat strait 25 to 90 km from Saqqaq we conclude that the tsunamis  
were likely triggered by giant landslides.

Two historic landslide-triggered tsunamis in 1952 and 2000 had run-up heights of 1-1.8 m and 3 m in Saqqaq, respectively,  
and shows that historic events are at least an order of magnitude smaller than T1 and T2. However, tsunamis with a run-up  
430 height of up to 19 m could have occurred in the past 6000 years without being captured in the cored lakes as this interval is  
not covered by our survey. Likewise, the time between our oldest dated sediment core bottom (8.5 ka BP) and deglaciation  
(10 ka BP) defines a possibility field where older giant landslide tsunamis could have occurred. Nine giga-scale landslide  
deposits are described from Vaigat strait and as we only identify deposits from two resulting tsunamis in our study, we infer  
that the deposits from these other landslides could be encountered in this possibility field.



#### 435 **Data availability**

XRF core scanning data and AMS radiocarbon certificates are available at the GEUS Dataverse (currently shared using a private link, but will be publicly available when manuscript has been issued final doi):

<https://dataverse.geus.dk/privateurl.xhtml?token=a64a3df7-add2-49e7-868d-2512becb62df>

#### **CrediT authorship statement**

440 Niels Jákup Korsgaard: Conceptualization; Formal analysis; Investigation – field work lead and laboratory work; Visualization; Writing – original draft preparation. Kristian Svennevig: Conceptualization; Formal analysis; Investigation – field work; Visualization; Writing – review & editing. Anne Sofie Søndergaard: Investigation – field work; Formal analysis; Visualization; Writing – review & editing. Gregor Luetzenburg: Investigation – field work; Writing – review and editing. Mimmi Oksman: Investigation – microfossil screening; Formal analysis; Writing – review & editing. Nicolaj Krog Larsen:  
445 Resources – field equipment & laboratory facilities; Writing – review & editing.

#### **Competing interests**

The authors declare that they have no conflict of interest.

#### **Acknowledgements**

We thank Anthony Henry Ruter for identification of radiocarbon samples and Marie-Louise Siggaard-Andersen for XRF  
450 laboratory work. Anders Schomacker is thanked for constructive comments on the manuscript and K. Pauli for general support.

#### **References**

SDFI (Agency for Data Supply and Infrastructure): Grønlandske pilotdata - Disko Bugt [DEM] [ORTOFOTO] [TOPO50],  
<https://dataforsyningen.dk/data/4516>, [Accessed 28/06/2018].

455 Battarbee, R.W., Jones, V.J., Flower, R.J., Cameron, N. G., Bennion, H., Carvalho, L., and Juggins, S.: Diatoms, in: Tracking Environmental Change Using Lake Sediments Volume 3, Terrestrial, Algal, and Siliceous Indicators, edited by: Smol, J.P., Birks, H.J.B., and Last, W.M., Kluwer Academic Publishers, Dordrecht, Netherlands, 155–202, <https://doi.org/10.1007/0-306-47668-1>, 2001





- 460 Benjamin, J., Rosser, N.J., Dunning, S.A., Hardy, R.J., Kelfoun, K., and Szczuciński, W.: Transferability of a calibrated numerical model of rock avalanche run-out: Application to 20 rock avalanches on the Nuussuaq Peninsula, West Greenland. *Earth Surf. Process. Landforms*. <https://doi.org/10.1002/esp.4469>, 2018.
- Blikra, L.H., Longva, O., Braathen, A., Dehls, J.F., Stalsberg, K., and Anda, E.: Rock slope failures in norwegian fjord areas: Examples, spatial distribution and temporal pattern, In: Evans, S.G., Mugnozza, G.S., Strom, A., Hermanns, R.L. (eds.) Landslides from Massive Rock Slope Failure. NATO Science Series, vol 49. Springer, Dordrecht. [https://doi.org/10.1007/978-1-4020-4037-5\\_26](https://doi.org/10.1007/978-1-4020-4037-5_26), 2006.
- 465 Bondevik S, Svendsen JI, Mangerud J (1997) Tsunami sedimentary facies deposited by the Storegga tsunami in shallow marine basins and coastal lakes, western Norway. *Sedimentology* 44, 1115-1131, 1997.
- Chagué-Goff, C., Szczuciński, W., and Shinozaki, T.: Applications of geochemistry in tsunami research: A review. *Earth-Sci Rev.* 165, 203-244, <https://doi.org/10.1016/j.earscirev.2016.12.003>, 2017.
- 475 Chalmers, J.A., and Pulvertaft, T.C.R.: Development of the continental margins of the Labrador Sea: A review. R. C. L. Wilson, R. B. Whitmarsh, B. Taylor, & N. Froitzheim, (Eds.): Geological Society Special Publication 187, 77–105, <https://doi.org/10.1144/GSL.SP.2001.187.01.05>, 2001.
- Coeurdevey, L. and Soubirane, J.: SPOT 6/7 Imagery – User Guide, Technical Reference, Report No. SI/DC/13034-v1.0, Airbus Defence and Space Intelligence, France, 1-62, <https://earth.esa.int/eogateway/documents/20142/37627/SPOT-6-7-imagery-user-guide.pdf>, 2013.
- 480 Cremer, H.: The diatom flora of the Laptev Sea (Arctic Ocean). *Bibliotheca Diatomologica* Bd. 40, J. Cramer, Berlin & Stuttgart, 1998.
- 485 Dahl-Jensen, T., Larsen L. M., Pedersen, S. A. S., Pedersen, J., Jepsen, H. F., Pedersen, G., Nielsen, T., Pedersen, A. K., von Platen-Hallermund, F., and Weng, W.: Landslide and Tsunami 21 November 2000 in Paatuut, West Greenland, *Nat. Hazards* 31: 277–287, <https://doi.org/10.1023/B:NHAZ.0000020264.70048.95>, 2004.
- 490 Dam, G., Krarup Pedersen, G., Søndersholm, M., Midtgaard, H. H., Melchior Larsen, L., Nøhr-Hansen, H., and Pedersen, A. K.: Lithostratigraphy of the Cretaceous–Paleocene Nuussuaq Group, Nuussuaq Basin, West Greenland. *GEUS Bulletin*, 19, 1–171. <https://doi.org/10.34194/geusb.v19.4886>, 2009.



495 Franco, A., Moernaut, J., Schneider-Muntau, B., Strasser, M., and Gerns, B.: The 1958 Lituya Bay tsunami - Pre-event  
bathymetry reconstruction and 3D numerical modelling utilising the computational fluid dynamics software Flow-3D: *Nat.*  
*Hazards Earth Syst. Sci.* 20, 2255–2279, <https://doi.org/10.5194/nhess-20-2255-2020>, 2020.

500 Garde, A. and Steinfeldt, A.: *Precambrian geology between Qarajaq Isfjord and Jakobshavn Isfjord, West Greenland 1:  
250,000. Grønlands Geologiske Undersøgelse*, 1994.

GRASS Development Team: Geographic Resources Analysis Support System (GRASS) Software, Version 8.0. *Open Source  
Geospatial Foundation*. <https://grass.osgeo.org>, 2222.

505 Heaton, T.J., Kohler, P., Butzin, M., Bard, E., Reimer, R.W., Austin, W.E.N., Ramsey, C.B., Grootes, P.M., Hughen, K.A.,  
Kromer, B., Reimer, P.J., Adkins, J., Burke, A., Cook, M.S., Olsen, J., and Skinner, L.C.: Marine20 - the marine radiocarbon  
age calibration curve (0-55,000 cal Bp). *Radiocarbon* 62, 779-820, <https://doi.org/10.1017/RDC.2020.68>, 2020.

Hermanns, R.L., L'heureux, J.S., and Blikra, L.H.: Landslide triggered tsunami, displacement wave, *Encyclopedia of Earth  
Sciences Series*, 611–615, [https://doi.org/10.1007/978-1-4020-4399-4\\_95](https://doi.org/10.1007/978-1-4020-4399-4_95), 2013.

510 Hermanns, R.L., Niedermann, S., Villanueva Garcia, A., and Schellenberger, A.: Rock avalanching in the NW argentine andes  
as a result of complex interactions of lithologic, structural and topographic boundary conditions, climate change and active  
tectonics, Evans, S.G., Mugnozsa, G.S., Strom, A., Hermanns, R.L. (eds.) *Landslides from Massive Rock Slope Failure*.  
*NATO Science Series*, vol 49. Springer, Dordrecht. [https://doi.org/10.1007/978-1-4020-4037-5\\_27](https://doi.org/10.1007/978-1-4020-4037-5_27), 2006.

515 Hermanns, R.L., Penna, I.M., Oppikofer, T., Noël, F., and Velardi, G.: Rock Avalanche, Shroder, J.F. (ed.), *Treatise on  
Geomorphology*, Elsevier, <https://doi.org/10.1016/B978-0-12-818234-5.00183-8>, 2021.

520 Higman, B. et al.: The 2015 landslide and tsunami in Taan Fiord, Alaska: *Sci. Rep.* 8, 1–13, [https://doi.org/10.1038/s41598-  
018-30475-w](https://doi.org/10.1038/s41598-018-30475-w), 2018.

Hungr, O., Leroueil, S., and Picarelli, L.: The Varnes classification of landslide types, an update. *Landslides* 11, 167–194,  
<https://doi.org/10.1007/s10346-013-0436-y>, 2014.

525 Long, A.J., Roberts, D.H., and Wright, M.R.: Isolation basin stratigraphy and Holocene relative sea-level change on  
Arveprinsen Ejland, Disko Bugt, West Greenland. *J. Quat. Sci.* 14 (4) 323–345, [doi.org/10.1002/\(SICI\)1099-  
1417\(199907\)14:4%3C323::AID-JQS442%3E3.0.CO;2-0](https://doi.org/10.1002/(SICI)1099-1417(199907)14:4%3C323::AID-JQS442%3E3.0.CO;2-0), 1999.



- 530 Long, A.J., Roberts D.H., Simpson, M.J.R., Dawson, S., Milne, G.A., and Huybrechts, P.: Late Weichselian relative sea-level changes and ice sheet history in southeast Greenland. *Earth Plan Sci Letts* 8(2) 8-18, <https://doi.org/10.1016/j.epsl.2008.03.042>, 2008.
- Long, A.J., Szczuciński, W., and Lawrence. T.: Sedimentary evidence for a mid-Holocene iceberg-generated tsunami in a coastal lake, west Greenland. *Arktos* 1:6, <https://doi.org/10.1007/s41063-015-0007-7>, 2015.
- 535 MacAyeal, D.R., Abbot, D.S. and Sergienko, O.V.: *Ann. of Glaciol.* 52, 58, 51–56, <https://doi.org/10.3189/172756411797252103>, 2011.
- Marcussen, C., Chalmers, J.A., Andersen, H.L., Rasmussen R. and Dahl-Jensen, T.: Acquisition of high-resolution multichannel seismic data in the offshore part of the Nuussuaq Basin, central West Greenland. *Geology of Greenland Survey Bulletin* 189, 34–40, <https://doi.org/10.34194/ggub.v189.5195>, 2001.
- 540 Morlighem, M., Williams, C. N., Rignot, E. J., An, L., Arndt, J. E., Bamber, J. L., Catania, G. A., Chauché, N., Dowdeswell, J. A., Dorschel, B., Fenty, I., Hogan, K., Howat, I. M., Hubbard, A. L., Jakobsson, M., Jordan, T. M., Kjeldsen, K. K., Millan, R., Mayer, L., Mouginot, J., Noël, B. P. Y., O’Cofaigh, C., Palmer, S. J., Rysgaard, S., Seroussi, H., Siegert, M. J., Slabon, P., Straneo, F., Broeke, M. R. van den, Weinrebe, W., Wood, M., and Zinglensen, K. B.: IceBridge BedMachine Greenland, Version 4, NASA National Snow and Ice Data Center Distributed Active Archive Center, <https://doi.org/10.5067/VLJ5YXKCNGXO>, 2021.
- 550 Oksman, M., Kvorning, A.B., Larsen, S.H., Kjeldsen, K.K., Mankoff, K.D., Colgan, W., Andersen, T.J.Nørgaard-Pedersen, N., Seidenkrantz, M.-S., Mikkelsen, N., and Ribeiro, S.: Impact of freshwater runoff from the southwest Greenland Ice Sheet on fjord productivity since the late 19th century. *The Cryosphere* 16, 2471–2491, <https://doi.org/10.5194/tc-16-2471-2022>, 2022.
- 555 Oppikofer, T., Hermanns, R.L., Roberts, N.J., and Böhme, M.: SPLASH: semi-empirical prediction of landslide-generated displacement wave run-up heights. *Subaqueous Mass Movements*, Lintern, D.G., Mosher, D.C., Moscardelli, L.G., Bobrowsky, P.T., Campbell, C., Chaytor, J.D., Clague, J.J., Georgiopoulou, A., Lajeunesse, P., Normandeau, A., Piper, D.J.W., Scherwath, M., Stacey, C. and Turmel, D. (eds.), Geological Society, London, Special Publications 477, <https://doi.org/10.1144/SP477.1>, 2018.
- 560



- Paris, A., Okal, E.A., Guérin, C., Heinrich, P., Schindelé, F., and Hébert, H.: Numerical Modeling of the June 17, 2017 Landslide and Tsunami Events in Karrat Fjord, West Greenland. *Pure and Applied Geophysics* 176, 3035–3057, <https://doi.org/10.1007/s00024-019-02123-5>, 2019.
- 565 Patton, A.I., Rathburn, S.L., and Capps, D.M.: Landslide response to climate change in permafrost regions. *Geomorphology* 340, 116–128, <https://doi.org/10.1016/j.geomorph.2019.04.029>, 2019.
- Pearce, C., Weckström, K., Sha, L., Miettinen, A., and Seidenkrantz, M.-S.: The Holocene marine diatom flora of Eastern Newfoundland bays. *Diatom Research*, 29:4, 441–454, <https://doi.org/10.1080/0269249X.2014.925508>, 2014.
- 570 Pedersen, M., Weng, W. L., Keulen, N., and Kokfelt, T. F.: A new seamless digital 1:500 000 scale geological map of Greenland. *GEUS Bulletin*, 28, 65–68. <https://doi.org/10.34194/geusb.v28.4727>, 2013.
- Pedersen, S.A.S., Larsen, L.M., Dahl-jensen, T., Jepsen, H.F., Krarup, G., Nielsen, T., Pedersen, A.K., von Platen-Hallermund, F., and Weng, W.L.: Tsunami-generating rock fall and landslide on the south coast of Nuussuaq, central West Greenland. *Geology of Greenland Survey Bulletin* 191, 73–83, <https://doi.org/10.34194/ggub.v191.5131>, 2002.
- 575 Porter, C., Morin, P., Howat, I., Noh, M.-J., Bates, B., Peterman, K., Keesey, S., Schlenk, M., Gardiner, J., Tomko, K., Willis, M., Kelleher, C., Cloutier, M., Husby, E., Foga, S., Nakamura, H., Platson, M., Wethington, M. Jr., Williamson, C., Bauer, G., Enos, J., Arnold, G., Kramer, W., Becker, P., Doshi, A., D'Souza, C., Cummins, P., Laurier, F., and Bojesen, M.: ArcticDEM, v3.0, Harvard Dataverse [data set], <https://doi.org/10.7910/DVN/OHHUKH>, 2018.
- Pulvertaft, T.C.R.: The geology of Sarqaqdalen, west Greenland, with special reference to the Cretaceous boundary fault system. *Grønlands Geologiske Undersøgelse Open File Series* No. 89/5. 1989.
- 585 Ramsey, C. B.: Bayesian analysis of radiocarbon dates. *Radiocarbon* 51, 337–360, <https://doi.org/10.1017/S0033822200033865>, 2009.
- Reimer, P. J., Austin, W. E. N., Bard, E., Bayliss, A., Blackwell, P. G., Bronk Ramsey, C., Butzin, M., Cheng, H., Edwards, R.L., Friedrich, M., Grootes, P. M., Guilderson, T. P., Hajdas, I., Heaton, T. J., Hogg, A. G., Hughen, K. A., Kromer, B., Manning, S. W., Muscheler, R., Palmer, J. G., Pearson, C., van der Plicht, H., Reimer, R. W., Richards, D., Scott, E. M., Southon, J. R., Turney, C. S. M., Wacker, L., Adophi, F., Büntgen, U., Capano, M., Fahrni, S., Fogtmann-Schulz, A., Friedrich, R., Kudsk, S., Miyake, F., Olsen, J., Reinig, F., Minoru Sakamoto, M., Sookde A., and Talamo, S.: The IntCal20 Northern



595 Hemisphere radiocarbon calibration curve (0–55 kcal BP), *Radiocarbon*, 62, 725–757, <https://doi.org/10.1017/RDC.2020.41>,  
2020.

600 Rothwell, R. and Croudace, I.: Twenty Years of XRF Core Scanning Marine Sediments: What Do Geochemical Proxies Tell Us?, in: *Micro-XRF Studies of Sediment Cores. Developments in Paleoenvironmental Research*, edited by: Croudace, I., Rothwell, R., Springer, Dordrecht, vol 17, 25-102, [https://doi.org/10.1007/978-94-017-9849-5\\_2](https://doi.org/10.1007/978-94-017-9849-5_2), 2015

Sepulveda, S.A., Serey, A., Lara, M., Pavez, A., and Rebolledo, S.: Landslides induced by the April 2007 Aysén Fjord earthquake, Chilean Patagonia: Landslides 7, 483–492, <https://doi.org/10.1007/s10346-010-0203-2>, 2010.

605 Shinozaki, T.: Geochemical approaches in tsunami research: current knowledge and challenges. *Geosci. Lett.* 8:6, <https://doi.org/10.1186/s40562-021-00177-9>, 2021.

Strunk, A., Olsen, J., Sanei, H., Rudra, A. and Larsen, N.K.: Improving the reliability of bulk sediment radiocarbon dating, *Quat. Sci. Rev.* 242, 106442, <https://doi.org/10.1016/j.quascirev.2020.106442>, 2020.

610 Svennevig, K.: Preliminary landslide mapping in Greenland. *GEUS Bulletin*, 43. <https://doi.org/10.34194/GEUSB-201943-02-07>, 2019.

615 Svennevig, K., Dahl-Jensen, T., Keiding, M., Boncori, J.P.M., Larsen, T., Salehi, S., Solgaard, A.M., and Voss, P.H.: Evolution of events before and after the 17 June 2017 rock avalanche at Karrat Fjord, West Greenland – a multidisciplinary approach to detecting and locating unstable rock slopes in a remote Arctic area: *Earth Surface Dynamics* 8, 1021–1038, <https://doi.org/10.5194/esurf-8-1021-2020>, 2020.

620 Svennevig, K., Hermanns, R.L., Keiding, M., Binder, D., Citterio, M., Dahl-Jensen, T., Mertl, S., Sørensen, E.V., and Voss, P.H.: A large frozen debris avalanche entraining warming permafrost ground - the June 2021 Assapaat landslide, West Greenland. *Landslides*, <https://doi.org/10.1007/s10346-022-01922-7>, 2022.

625 Svennevig, K., Keiding, M., Korsgaard, N.J., Lucas, A., Owen, M., Poulsen, M.D., Priebe, J., Sørensen E.V., Morino, C.: Uncovering a 70-year-old permafrost degradation induced disaster in the Arctic, the 1952 Niiortuut landslide-tsunami in central West Greenland. *Science of the Total Environment*, 859. <https://doi.org/10.1016/j.scitotenv.2022.160110>, 2023.

Svennevig, K., Owen, M.J., Citterio, M., Nielsen, T., Rosing, S., Harff, J., Endler, R., Morlighem, M., Rignot, E. Holocene giga-scale rock avalanches in Vaigat, West Greenland – implications for geohazard. *Geology, in review*



630 Voss, P.H., Poulsen, K., Simonsen, S.B., and Gregersen, S.: Seismic hazard assessment of Greenland. *Geol. Surv. Denmark Greenl. Bull.* 13, 57–60. <https://doi.org/10.34194/geusb.v13.4976>, 2007.

Wagner, B., Bennike, O., Klug, M., and Cremer, H.: First indication of Storegga tsunami deposits from East Greenland. *J. of Quat. Sci.* 22, 321–325. <https://doi.org/10.1002/jqs.1064>, 2006.

635 Weidick, A.: Observations on some Holocene glacier fluctuations in West Greenland. *Bulletin Grønlands Geologiske Undersøgelse*, 73, 1–202. <https://doi.org/10.34194/bullggv.v73.6611>, 1968.

Weidick, A.: Holocene shore-lines and glacial stages in Greenland - an attempt at correlation. *Rapport Grønlands Geologiske Undersøgelse*, 41, 1–39. <https://doi.org/10.34194/rapggv.v41.7281>, 1972.

640

Weidick, A. and Bennike, O.: Quaternary glaciation history and glaciology of Jakobshavn Isbræ and the Disko Bugt region, West Greenland: a review. *GEUS Bulletin*, 14, 1–78. <https://doi.org/10.34194/geusb.v14.4985>, 2007.

645 Witkowski, A., Lange-Bertalot, H., and Metzeltin, D.: Diatom flora of marine coasts I. *Iconographia Diatomologica* Vol. 7. A.R.G.Ganter Verlag K.G., Ruggell. 925 pp., ISBN 9783904144100, 2000.



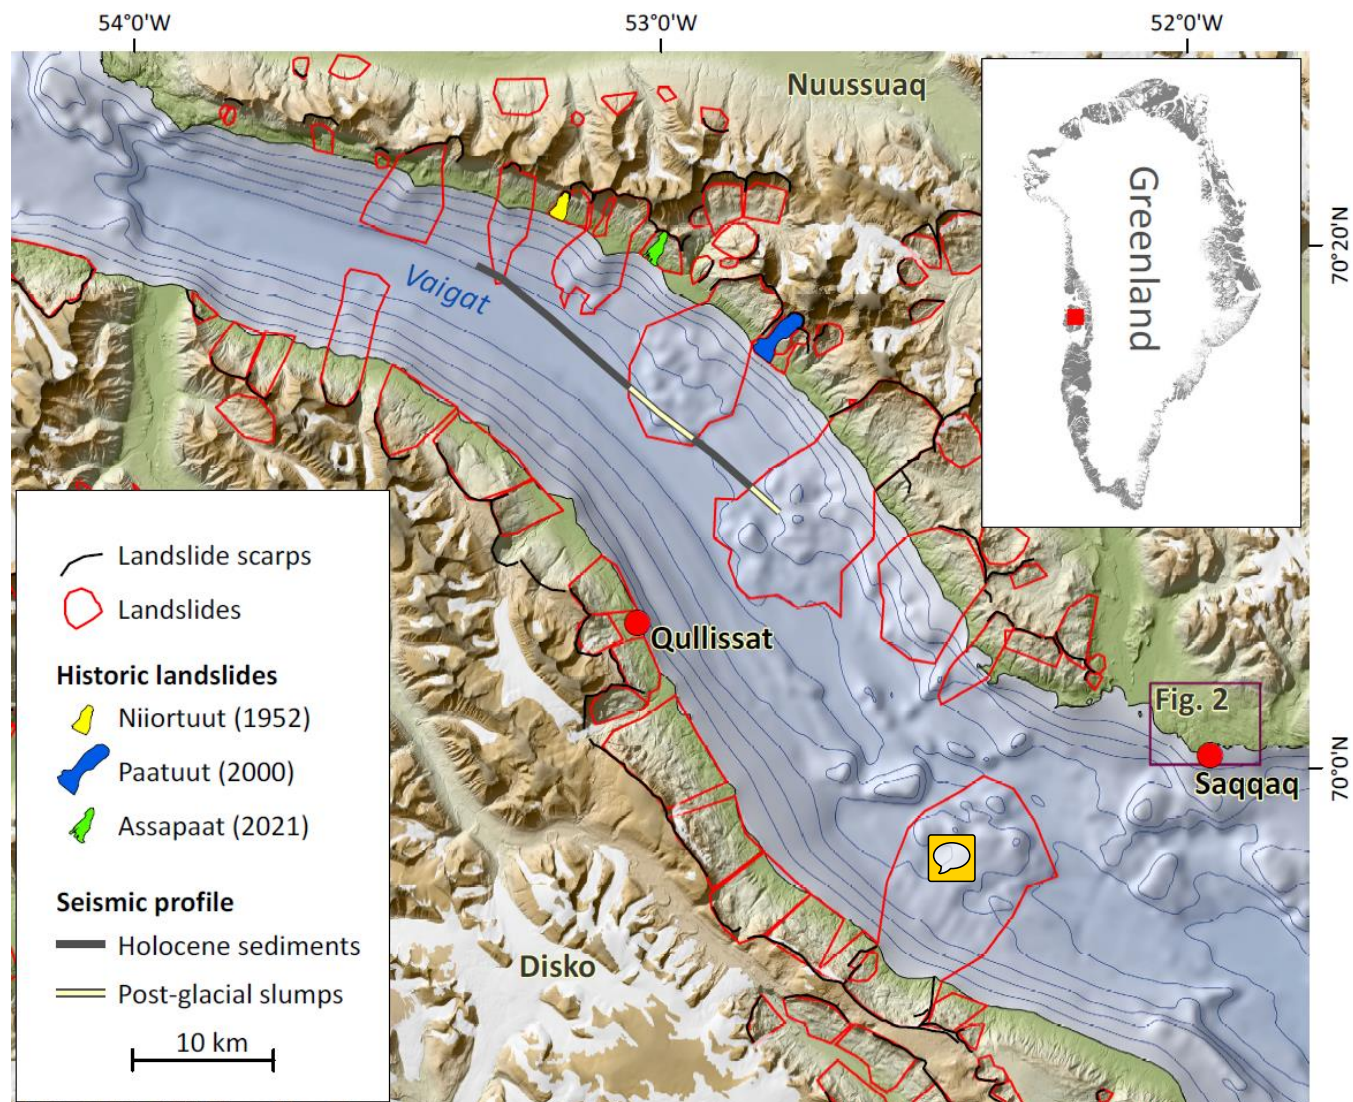

650

Figure 1: Landslide mapping by Svennevig (2019) and Svennevig et al (2023b). Bathymetry from Bedmachine Greenland v4 (Morlighem et al., 2021), other map data from SDFI (2018) and ArcticDEM (Porter et al., 2018). A seismic profile line from Vaigat available from Marcussen et al. (2001) is shown, where the sediments along the profile were interpreted as either post-glacial slumps or glacial moraines, surrounded by horizontal Holocene sediments.

655

660



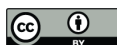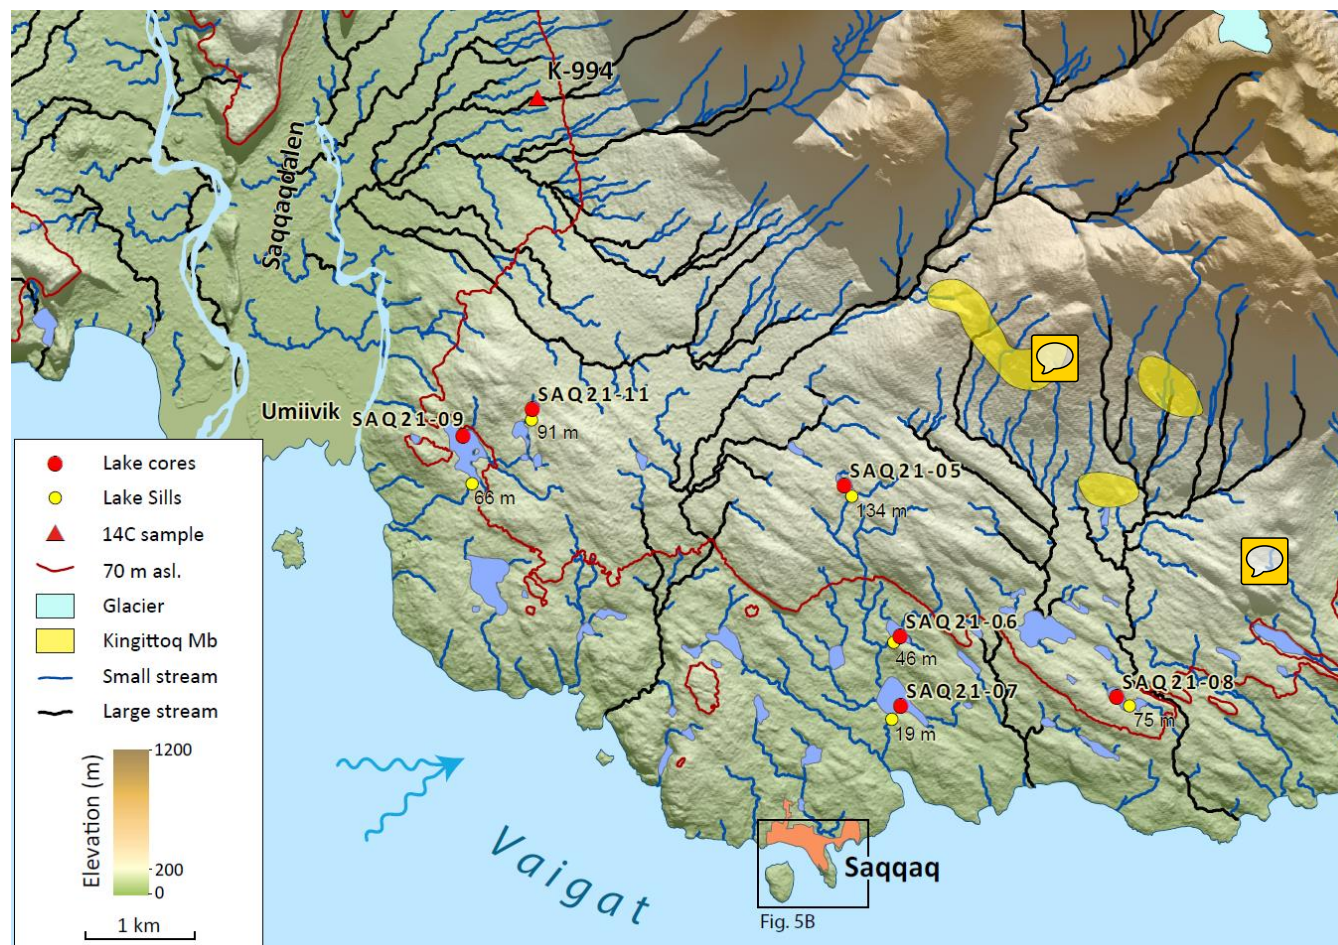

Figure 2: Lake sediment coring sites at the Saqqaq foreland and surroundings. The foreland range 0-200 m a.s.l. and has multiple lakes in this height interval. The elevation colour scale has been partitioned into intervals below and above 200 m to emphasize the morphology. Inferred directional ranges of the tsunamis are indicated with wavy blue arrows. Catchments of the cored lakes are local and water entering the lakes is from rainfall or snowmelt and sheltered from the rivers draining the mountains. The 70 m contour represents the coastline at 9.5 ca. ka BP as inferred by a radiocarbon dated marine shell (K-994 from Weidick, 1972). DEM and map data from SDFI (2018) except for the streams which were derived from the DEM using GRASS (2022). Geological map data from Pedersen et al. (2013).

665

670

675

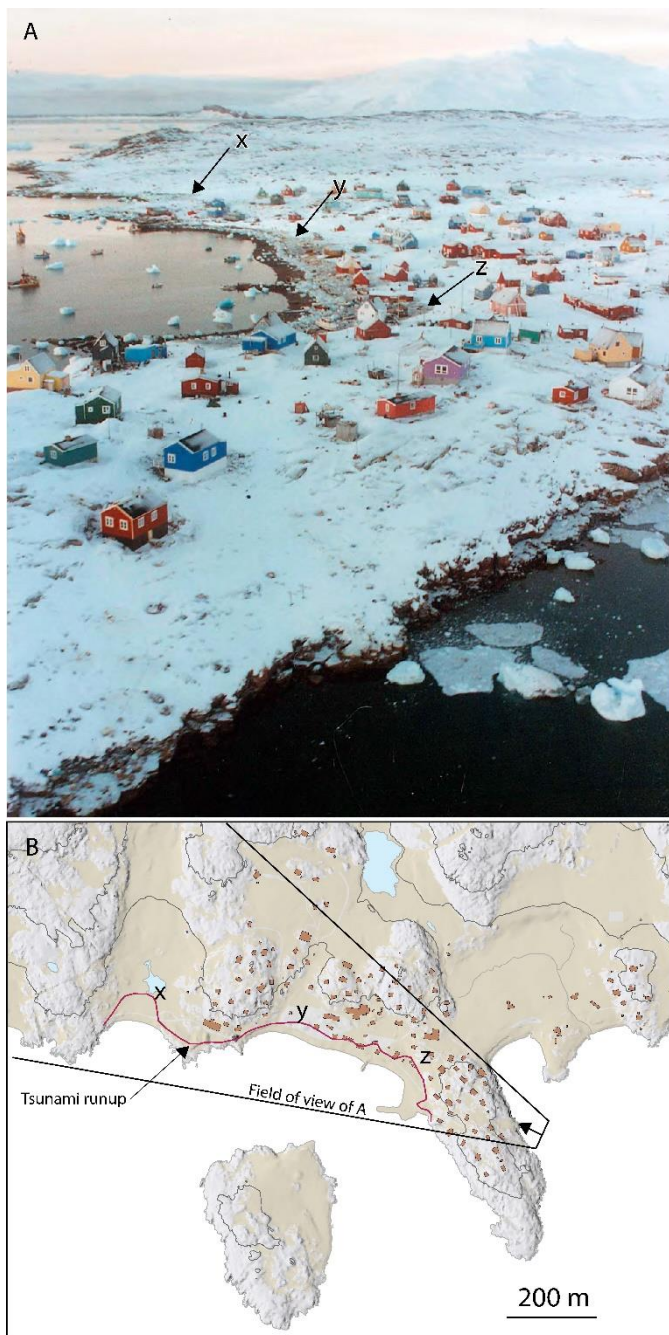

680 Figure 3: A) photograph by the Illulissat Police the day after the tsunami that reached Saqqaq after the November 21, 2000, landslide at Paatuut. The maximum run-up is seen as discoloration and removal of the snow indicated with x, y and z. B) Topographic map of Saqqaq from ASIAQ with the viewing direction and field of view of the photo in A. The maximum tsunami run-up is indicated with a red line x, y, and z refers to the same marked localities in A.

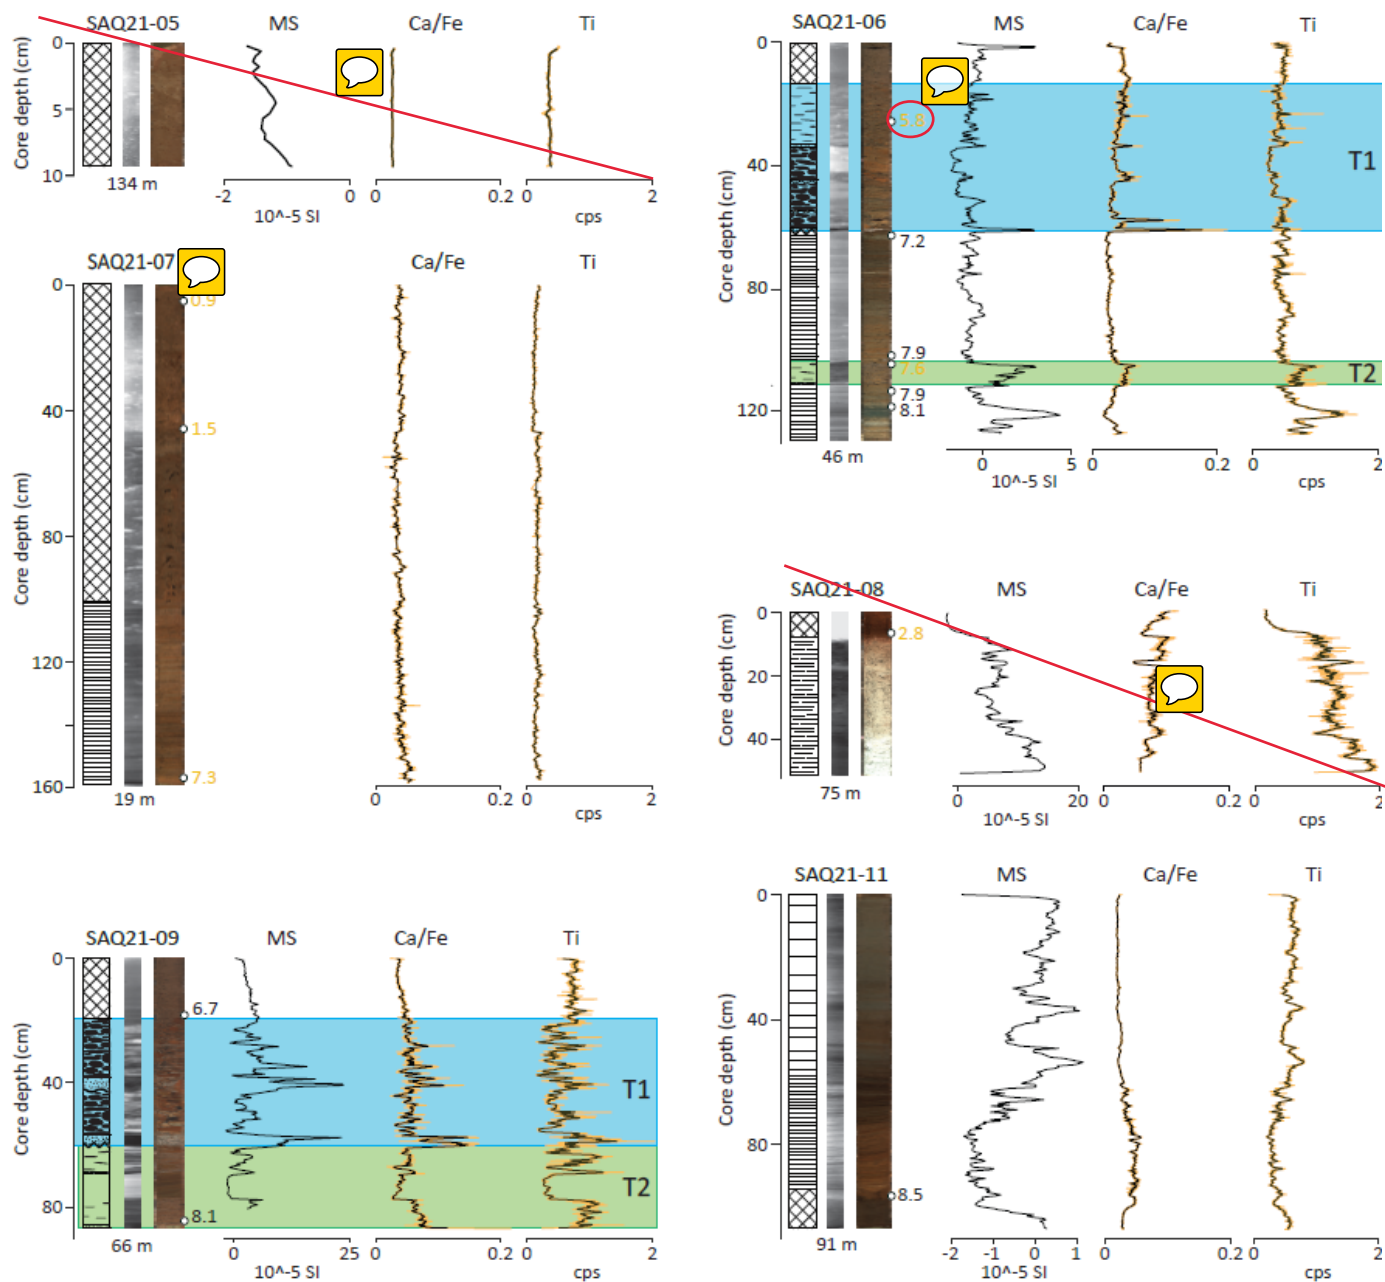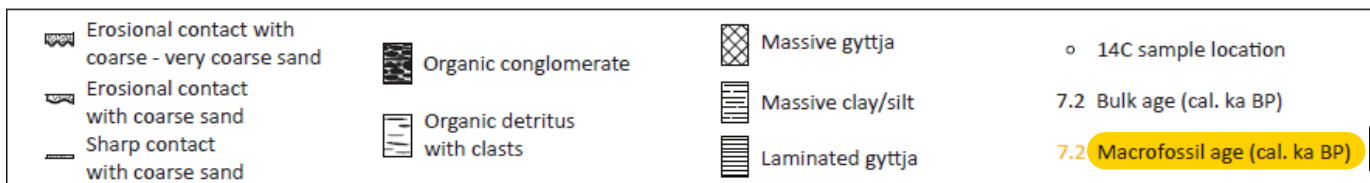

**Figure 4: Sediment proxies (optical core and x-ray images, stratigraphy and XRF) and calibrated radiocarbon ages from the six lakes. T1 and T2 show tsunami sediment units.**



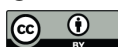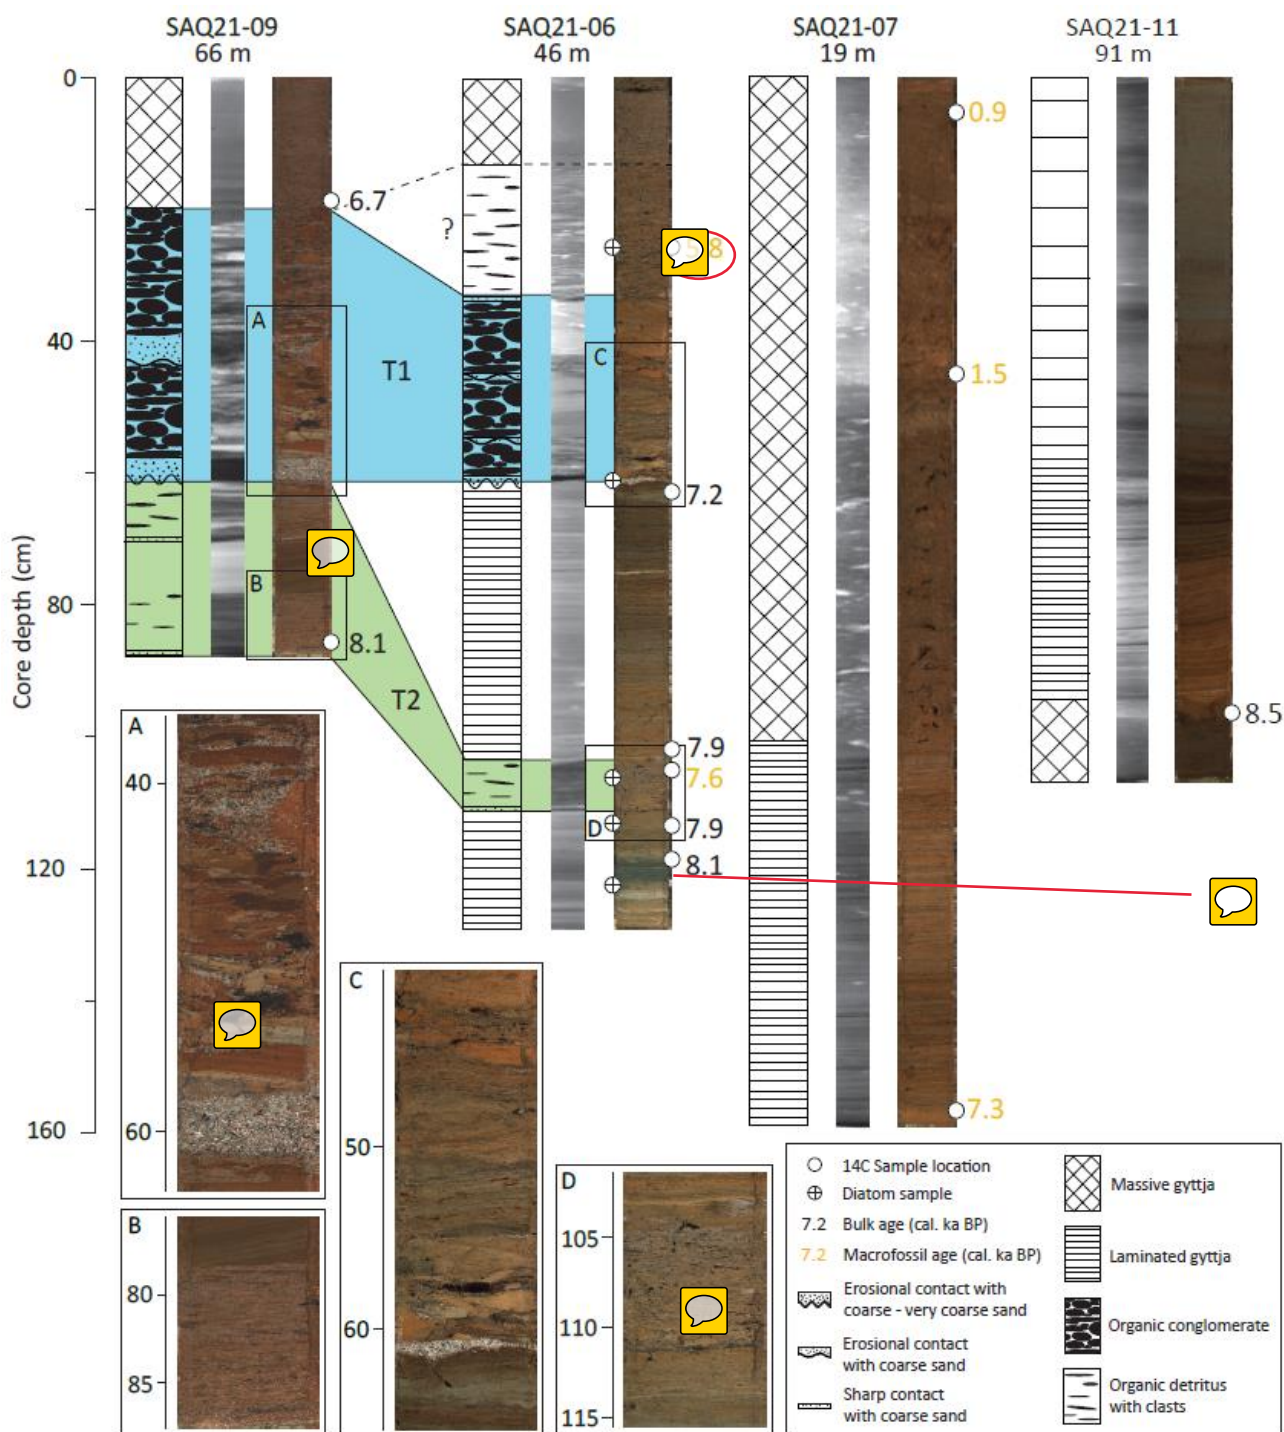

685

Figure 5: Correlation of tsunami facies T1 and T2 in lake cores SAQ21-06 and SAQ21-09. A-D show details of the tsunami units T1 and T2.

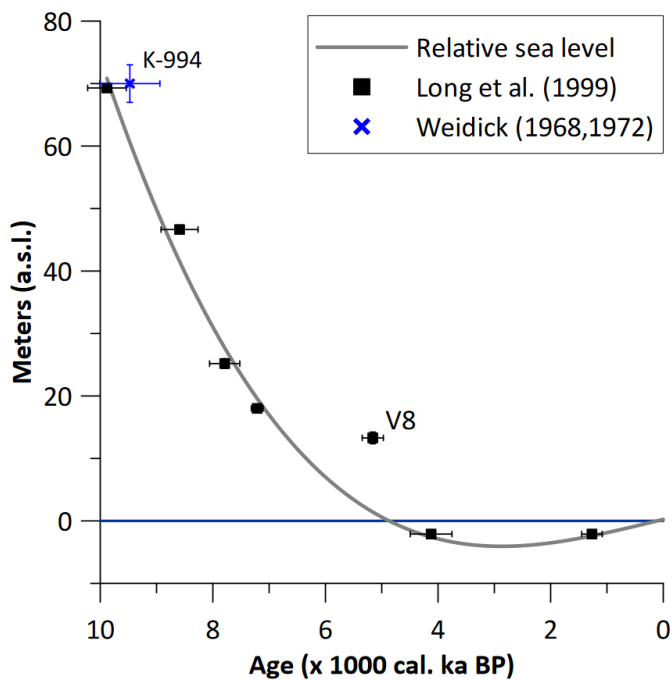

690 **Figure 6: Recalibrated relative sea level curve from Vaskebugt, Arveprinsen Ejland (Long et al., 1999). Sample V8 was excluded from the polynomial fit.**

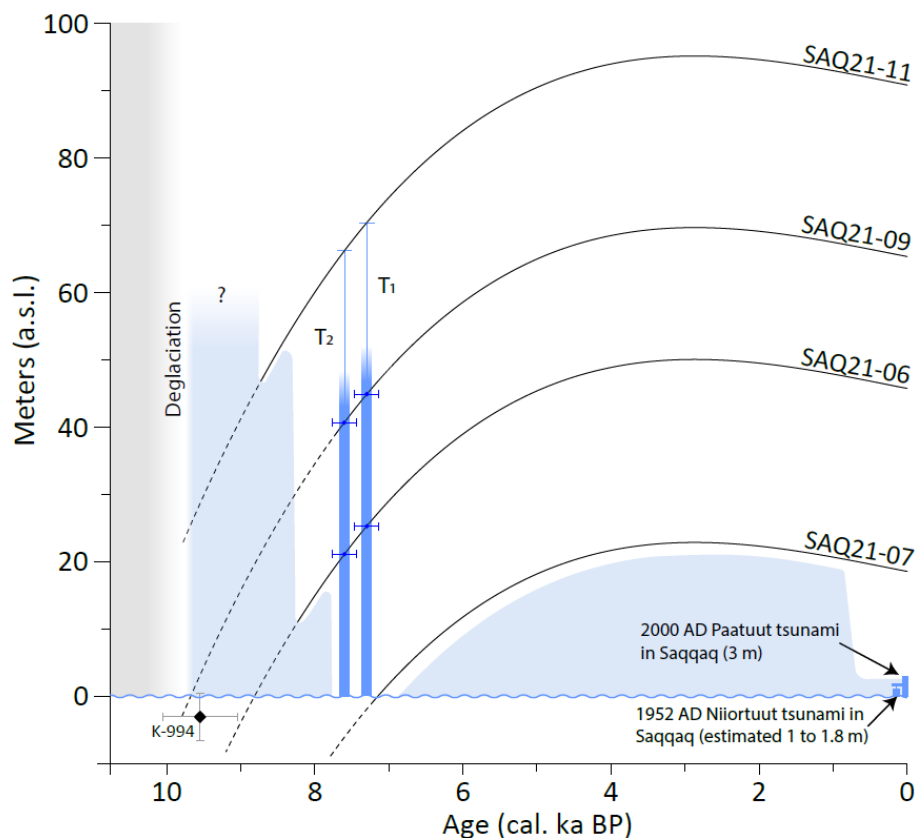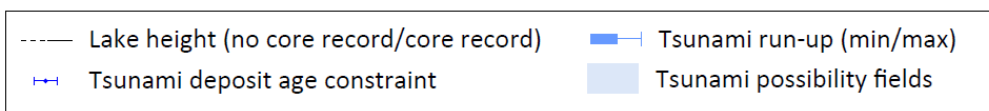

695 **Fig. 7. Lake elevations of four lakes extended back in time using present-day elevation and the recalibrated relative sea level curve (Fig. 6). Tsunamis T1 and T2 have been plotted and the intersection with the lake elevation curves shows the lake elevations when lakes SAQ21-06 and -09 were invaded by tsunami waves. This provides the minimum run-up height of T1 and T2. Our core record does not cover sediment older than 8.5 cal. ka BP and lakes at elevations below c. 19 m and younger than c. 6 ka BP. These elevations/ages define fields where tsunamis are possible, but not recorded by our data (light blue “tsunami possibility fields”). The maximum run-up heights of two historical tsunami waves from 1952 (Svennevig et al., 2023a) and 2000 from the present study are shown for comparison.**

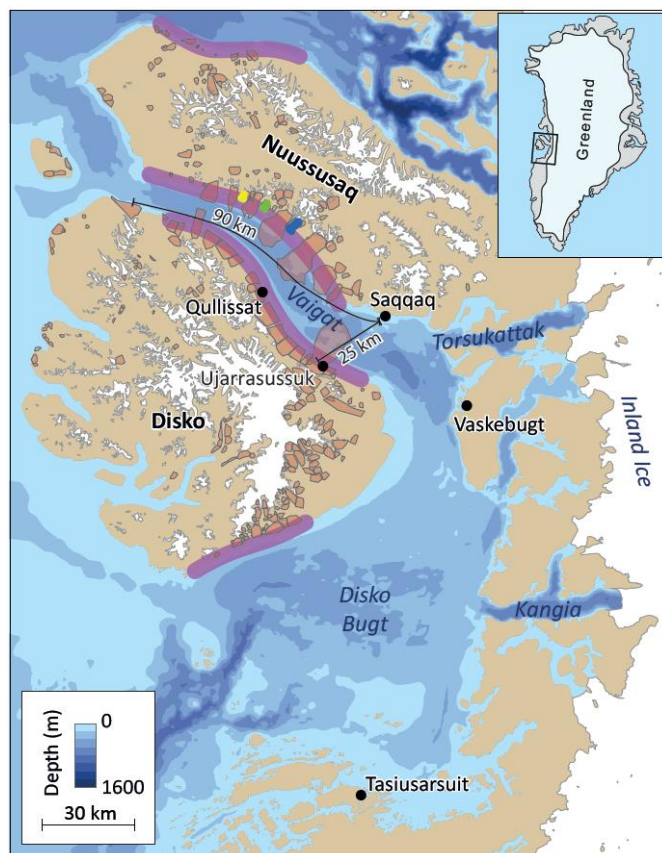

700 **Figure 8: Bathymetry of Disko Bugt, Vaigat and neighboring fjords (Pedersen et al., 2013; Morlighem et al., 2021). Areas with a high risk of landslides (Dahl-Jensen et al., 2004) is shown as purple shadings along the north and south coasts of Disko Island and Nuussuaq. Mapped post glacial landslides (Svennevig, 2019) are shown as red polygons and historical landslides in Vaigat in 1952 (Niortuut, yellow), 2000 (Paatuut, blue), and 2021 (Assapaat, green) is also indicated.**



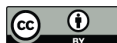

| Lab number  | Core/Lake No.          | Latitude °N | Longitude °W | Sample depth from core top (cm) | Material                | 14C age BP ± 1σ | cal. ka BP (max) | cal. ka BP (min) | Sigma | cal. ka BP (median) | Sample setting                          | Reference          | Minimum sill height (m a.s.l.) | Sigma (m) |
|-------------|------------------------|-------------|--------------|---------------------------------|-------------------------|-----------------|------------------|------------------|-------|---------------------|-----------------------------------------|--------------------|--------------------------------|-----------|
| Ua-74363    | SAQ21-06               | 70.026179   | 51.920846    | 26-27                           | Aquatic bryophytes      | 5024±37         | 5897             | 5658             | 75    | 5782                | Above tsunami deposit                   | This study         | 46.0                           | 1.6       |
| Ua-74355    | SAQ21-06               | 70.026179   | 51.920846    | 62-63                           | Gyttja                  | 6315±35         | 7310             | 7164             | 46    | 7223                | Below erosional unconformity            | This study         | 46.0                           | 1.6       |
| Ua-74356    | SAQ21-06               | 70.026179   | 51.920846    | 102-103                         | Gyttja                  | 7081±44         | 8008             | 7795             | 48    | 7899                | Above tsunami deposit                   | This study         | 46.0                           | 1.6       |
| Ua-74364    | SAQ21-06               | 70.026179   | 51.920846    | 105-106                         | Aquatic bryophytes      | 6775±37         | 7675             | 7575             | 31    | 7625                | Single fossil in top of tsunami deposit | This study         | 46.0                           | 1.6       |
| Ua-74357    | SAQ21-06               | 70.026179   | 51.920846    | 112-113                         | Gyttja                  | 7097±35         | 8008             | 7843             | 41    | 7929                | Below erosional unconformity            | This study         | 46.0                           | 1.6       |
| Ua-74358    | SAQ21-06               | 70.026179   | 51.920846    | 118-119                         | Gyttja                  | 7335±37         | 8281             | 8024             | 59    | 8110                | Ti and Ca/Fe ratio shift                | This study         | 46.0                           | 1.6       |
| Ua-74365    | SAQ21-07               | 70.020487   | 51.920420    | 5.0                             | Aquatic bryophytes      | 1020±46         | 1054             | 792              | 63    | 926                 | Top of core                             | This study         | 18.8                           | 1.6       |
| Ua-74366    | SAQ21-07               | 70.020487   | 51.920420    | 46.5                            | Aquatic bryophytes      | 1628±35         | 1585             | 1405             | 52    | 1487                | Ti and Ca/Fe ratio shift                | This study         | 18.8                           | 1.6       |
| Ua-74359    | SAQ21-07               | 70.020487   | 51.920420    | 156-157                         | Gyttja                  | 6412±34         | 7423             | 7267             | 50    | 7341                | Bottom of core                          | This study         | 18.8                           | 1.6       |
| Ua-74367    | SAQ21-08               | 70.021490   | 51.868706    | 6-7                             | Aquatic bryophytes      | 2622±39         | 2848             | 2547             | 42    | 2749                | Ti and Ca/Fe ratio shift                | This study         | 75.2                           | 1.6       |
| Ua-74360    | SAQ21-09               | 70.042056   | 52.026509    | 18-19                           | Gyttja                  | 5861±33         | 6780             | 6564             | 46    | 6686                | Above tsunami deposit                   | This study         | 65.6                           | 1.6       |
| Ua-74361    | SAQ21-09               | 70.042056   | 52.026509    | 84-85                           | Gyttja                  | 7319±36         | 8185             | 8025             | 50    | 8105                | Rip-up clast in tsunami sediments       | This study         | 65.6                           | 1.6       |
| Ua-74362    | SAQ21-11               | 70.044366   | 52.010009    | 95-96                           | Gyttja                  | 7742±35         | 8591             | 8430             | 46    | 8512                | Ti and Ca/Fe ratio shift                | This study         | 91.1                           | 1.6       |
| K-994       | Saqqaa, Disko Bugt     | 70.07       | 52.01        | -                               | Shell, Saxicava Arctica | 8940±170        | 10059            | 8980             | 267   | 9474                | Uppermost part of marine clay           | Weidick 1968, 1972 | 70                             | 3         |
| Beta-107879 | V0, Arveprinsen Ejland | 69.76236    | 51.23374     | -                               | Gyttja                  | 8820±100        | 10180            | 9557             | 171   | 9881                | Isolation contact                       | Long et al., 1999  | 69.30                          | 0.46      |
| Beta-112544 | V2, Arveprinsen Ejland | 69.76716    | 51.23323     | -                               | Gyttja                  | 7780±120        | 8984             | 8382             | 164   | 8591                | Isolation contact                       | Long et al., 1999  | 46.64                          | 0.38      |
| Beta-112543 | V5, Arveprinsen Ejland | 69.77402    | 51.24918     | -                               | Gyttja                  | 6950±150        | 8159             | 7509             | 134   | 7789                | Isolation contact                       | Long et al., 1999  | 25.19                          | 0.78      |
| Beta-110748 | V7, Arveprinsen Ejland | 69.76756    | 51.25459     | -                               | Gyttja                  | 6290±40         | 7316             | 7075             | 52    | 7212                | Isolation contact                       | Long et al., 1999  | 18.01                          | 0.25      |
| Beta-110747 | V8, Arveprinsen Ejland | 69.76743    | 51.26005     | -                               | Gyttja                  | 4510±50         | 5315             | 4978             | 94    | 5159                | Isolation contact                       | Long et al., 1999  | 13.29                          | 0.93      |
| Beta-110457 | V9, Arveprinsen Ejland | 69.84323    | 51.09482     | -                               | Gyttja                  | 3750±130        | 4516             | 3725             | 185   | 4123                | Isolation contact                       | Long et al., 1999  | -2.10                          | 0.37      |
| Beta-110456 | V9, Arveprinsen Ejland | 69.84323    | 51.09482     | -                               | Gyttja                  | 1360±90         | 1467             | 1061             | 91    | 1266                | Isolation contact                       | Long et al., 1999  | -2.10                          | 0.37      |

705

**Table 1: All macrofossil samples in this study are aquatic bryophytes. All radiocarbon ages were calibrated using OxCal v4.4 (Ramsey, 2009) and the IntCal20 curve (Reimer et al., 2020), except for sample K-994 which was calibrated using the Marine20 curve (Heaton et al., 2020) using a marine reservoir age of 400 years (ΔR = -8 +-96). Errors on sill heights in our study are from Coeurdevey & Soubirane (2013).**

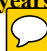

710

715



| Core/Lake No. | Latitude °N | Longitude °W | Minimum sill height (m a.s.l.) | Depth at coresite (m) | Lake area (m <sup>2</sup> ) | Length (m) | Width (m) | Core length (cm) |
|---------------|-------------|--------------|--------------------------------|-----------------------|-----------------------------|------------|-----------|------------------|
| SAQ21-05      | 70.038549   | 51.934820    | 133.6                          | 2.8                   | 13402                       | 230        | 85        | 9                |
| SAQ21-06      | 70.026179   | 51.920846    | 46.0                           | 5.3                   | 26253                       | 285        | 140       | 128              |
| SAQ21-07      | 70.020487   | 51.920420    | 18.8                           | 4.1                   | 91133                       | 560        | 290       | 158              |
| SAQ21-08      | 70,021490   | 51.868706    | 75.2                           | 6.0                   | 21372                       | 270        | 120       | 51               |
| SAQ21-09      | 70.042056   | 52.026509    | 65.6                           | 9.6                   | 101693                      | 640        | 270       | 87               |
| SAQ21-11      | 70.044366   | 52.010009    | 91.1                           | 5.5                   | 10584                       | 175        | 80        | 107              |

720 **Table 2: Lake and coring site characteristics.**
